# Supplementary figures and images for: Arterial Blood, Rather Than Venous Blood, is a Better Source for Circulating Melanoma Cells
Source: PubMed Central journal article supplement — eBioMedicine. 2015 Sep 18;2(11):1821–6. doi: 10.1016/j.ebiom.2015.09.019 (PMC4740300; doi:10.1016/j.ebiom.2015.09.019), 2015-09-18

# Supplement 1

A

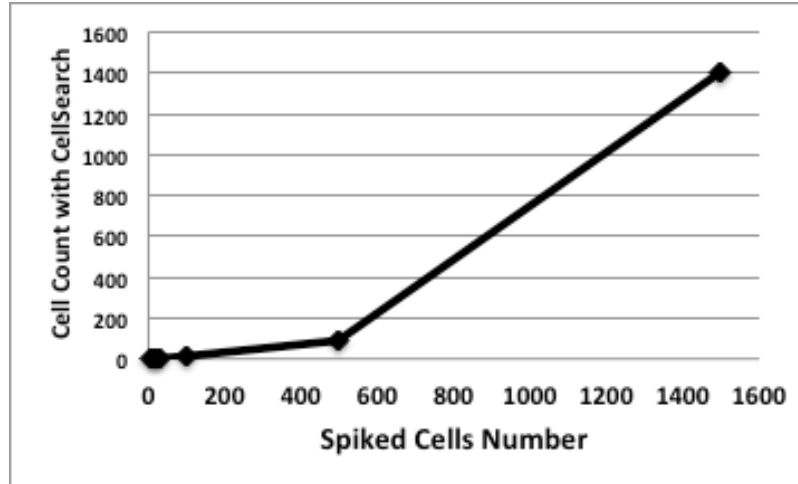

| Sample ID | Spiked Cells Number | Detection Cell Number |
|-----------|---------------------|-----------------------|
| CMC-1     | 5                   | 1                     |
| CMC-2     | 15                  | 1                     |
| CMC-3     | 30                  | 3                     |
| CMC-4     | 100                 | 8                     |
| CMC-5     | 500                 | 86                    |
| CMC-6     | 1500                | 1403                  |

B

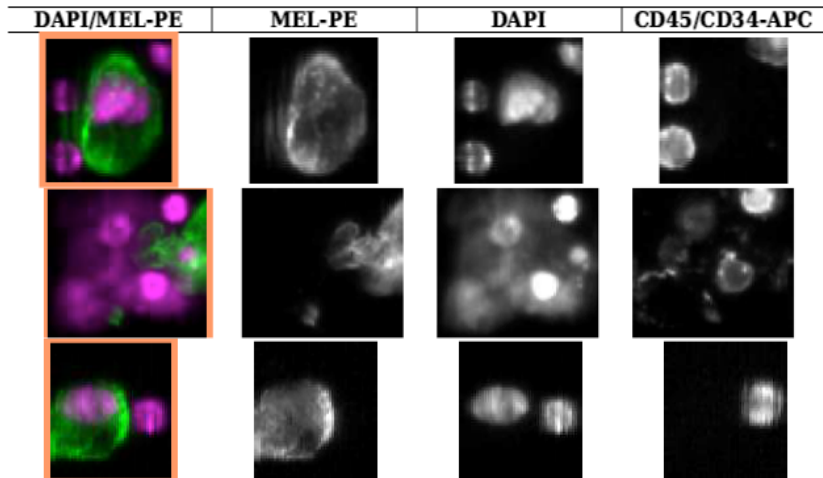

Supplement: mmc1.pdf [file mmc1.pdf]
